# Supplementary material for: The therapeutic effect of Bletilla striata extracts on LPS-induced acute lung injury by regulation of inflammation and oxidation
Source: Royal Society of Chemistry journal article supplement (doi:10.1039/c6ra17059e), 2016-01-01

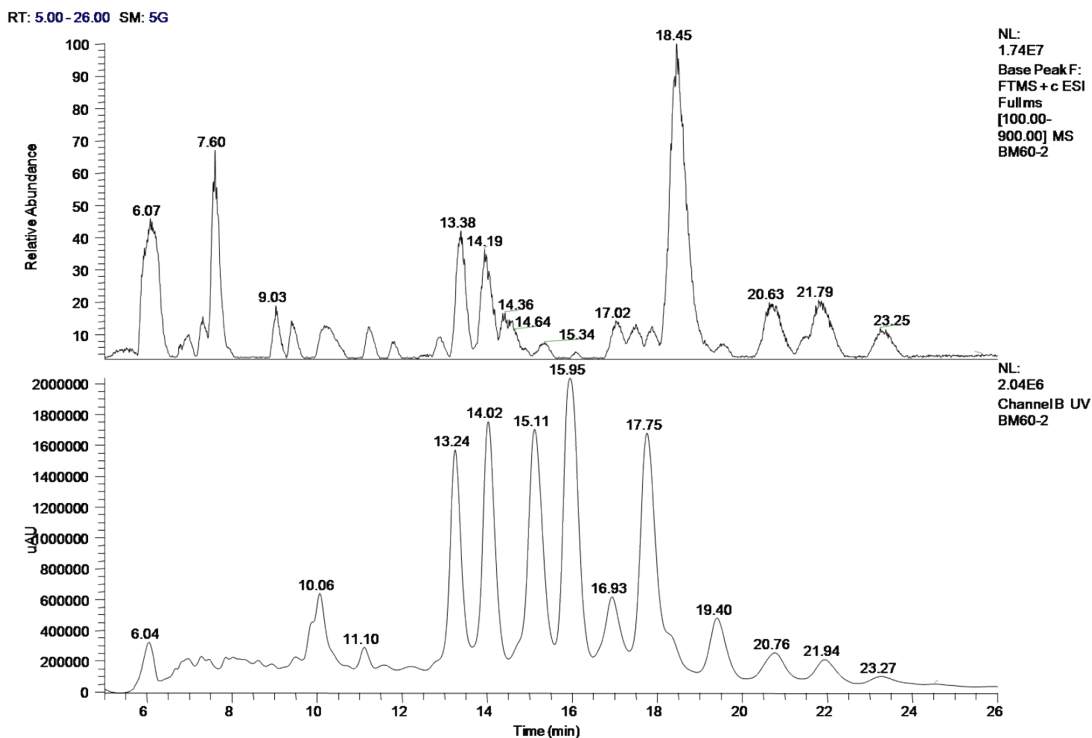

E:\data\Tests\201606\BM60-2

6/13/2016 7:37:07 PM

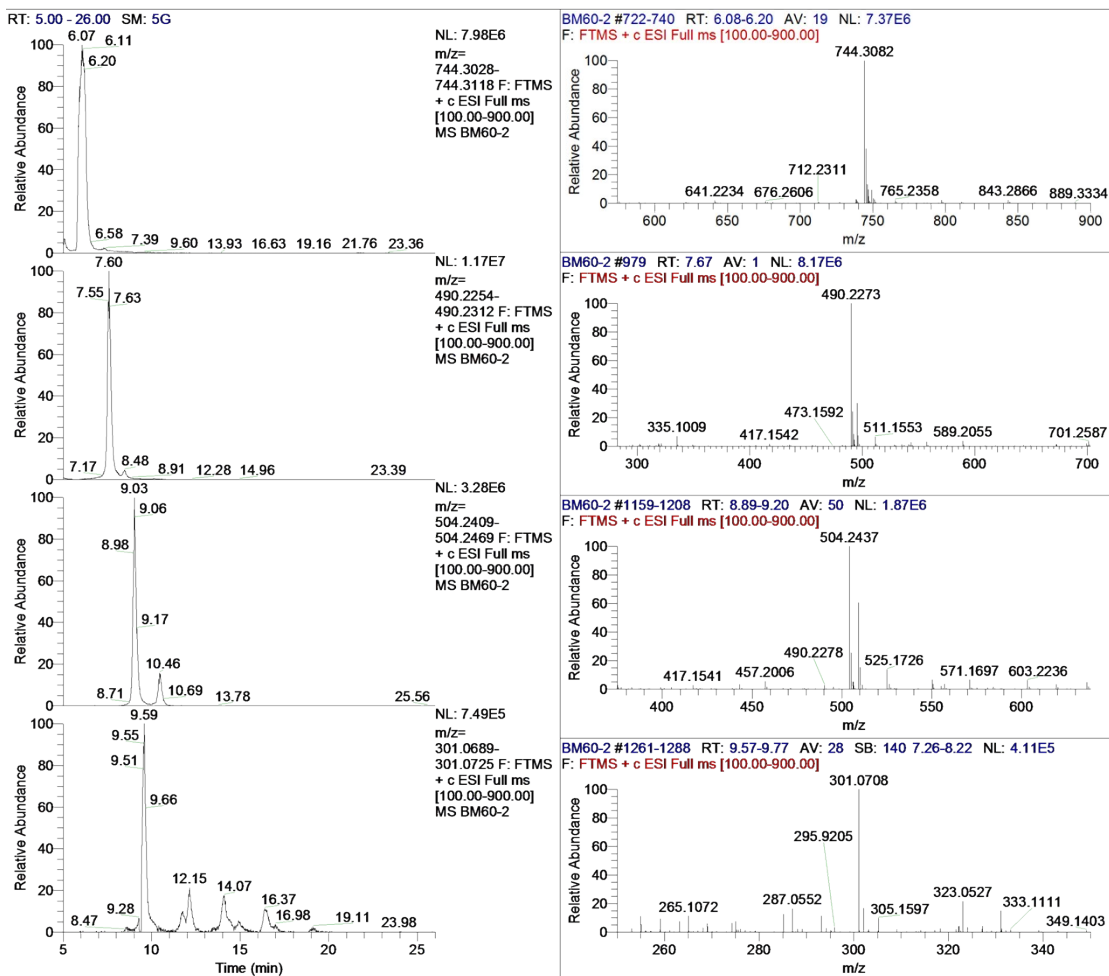

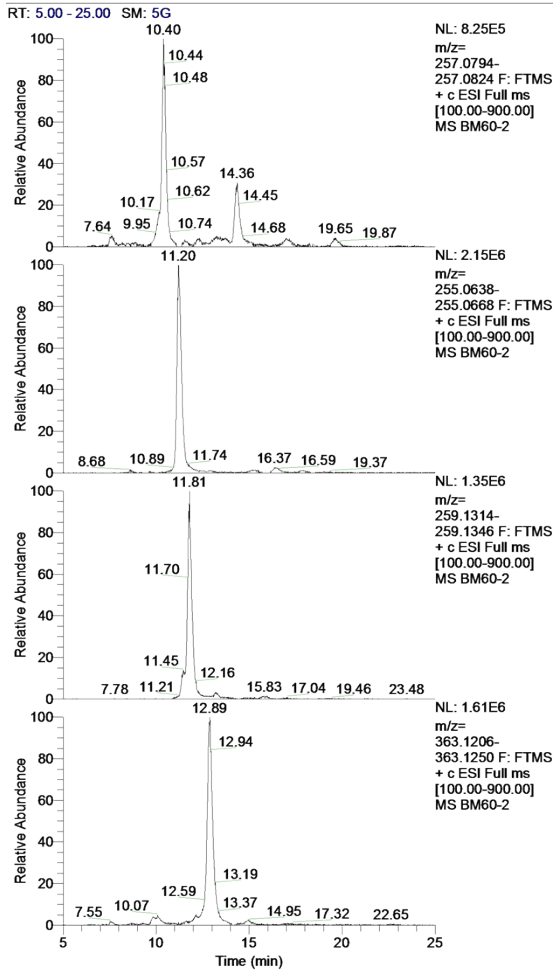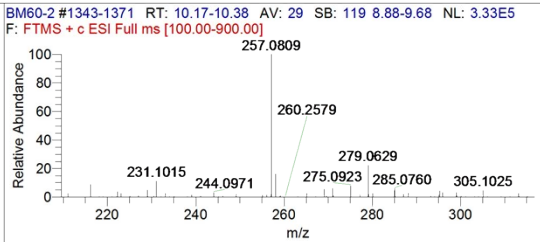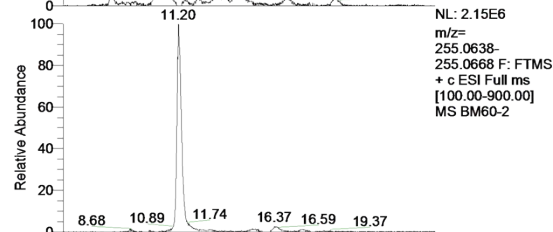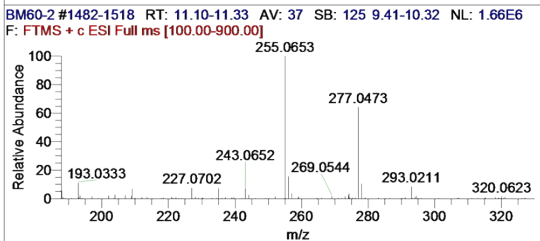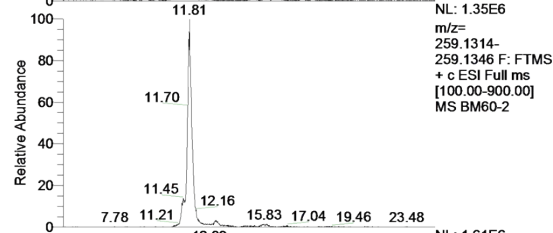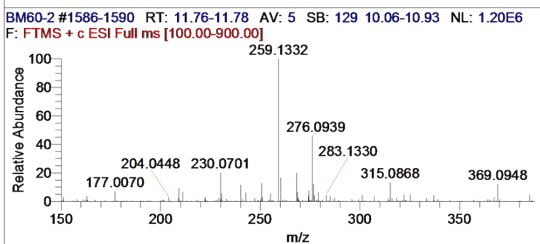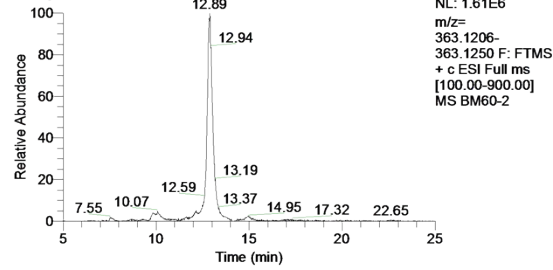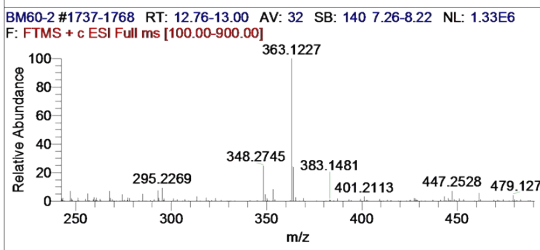

RT: 5.00 - 19.00 SM: 5G

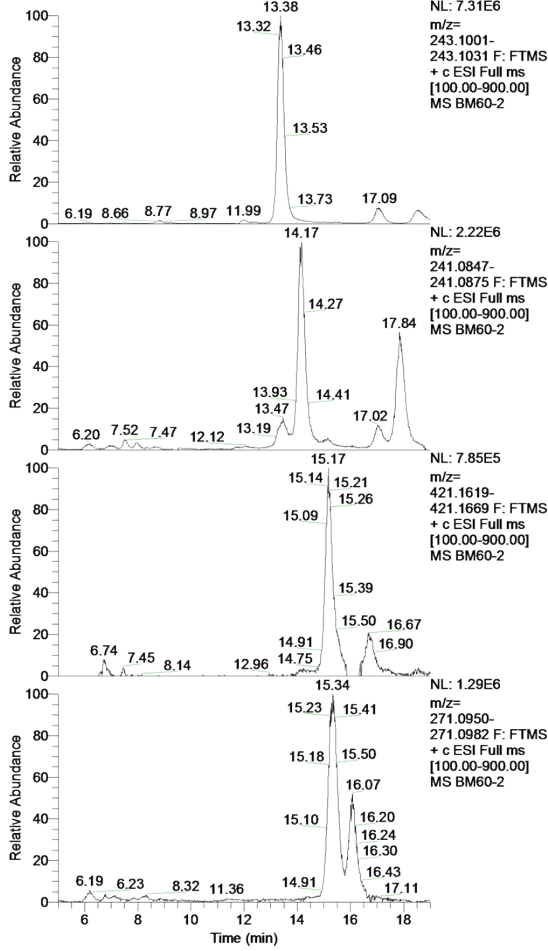

BM60-2 #1796-1824 RT: 13.17-13.36 AV: 29 NL: 4.19E6  
F: FTMS + c ESI Full ms [100.00-900.00]

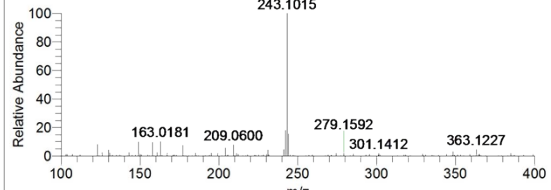

BM60-2 #1943-1946 RT: 14.24-14.26 AV: 4 NL: 1.50E6  
F: FTMS + c ESI Full ms [100.00-900.00]

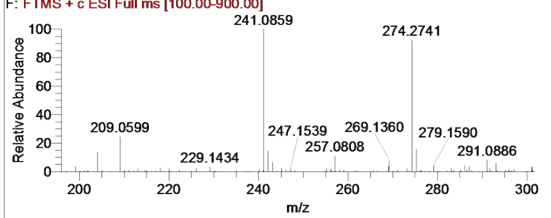

BM60-2 #2062-2063 RT: 15.12-15.13 AV: 2 NL: 6.76E5  
F: FTMS + c ESI Full ms [100.00-900.00]

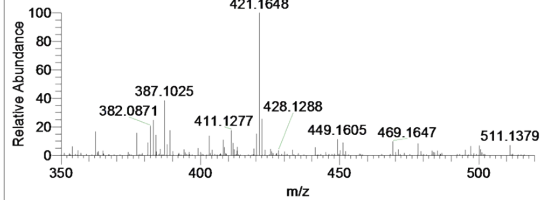

BM60-2 #2124-2126 RT: 15.56-15.57 AV: 3 SB: 221 13.78-15.41 NL: 3.32E5  
F: FTMS + c ESI Full ms [100.00-900.00]

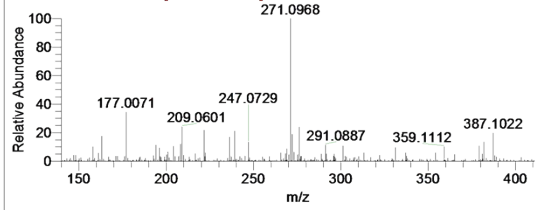

RT: 5.00 - 26.00 SM: 5G

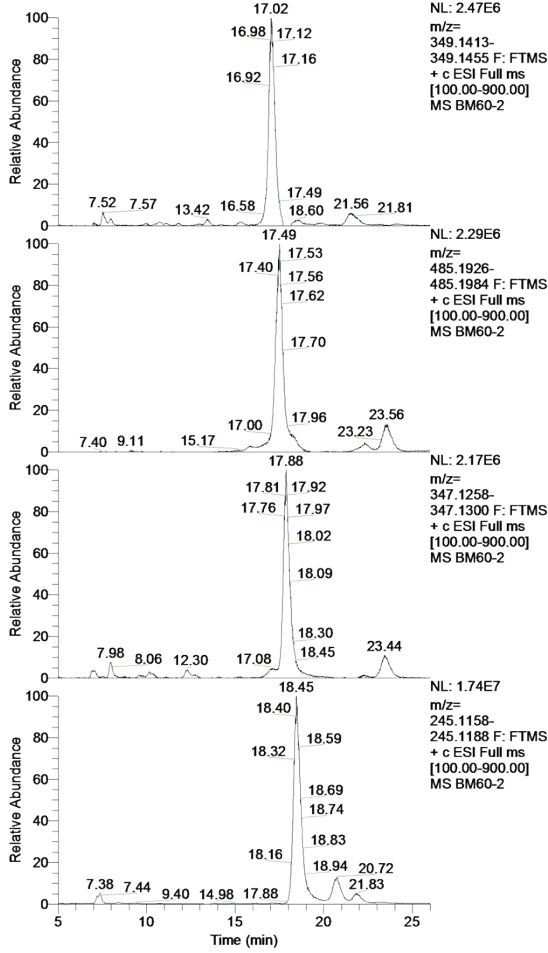

NL: 2.47E6  
m/z=  
349.1413-  
349.1455 F: FTMS  
+ c ESI Full ms  
[100.00-900.00]  
MS BM60-2

BM60-2 #2346-2415 RT: 16.92-17.32 AV: 70 NL: 1.81E6  
F: FTMS + c ESI Full ms [100.00-900.00]

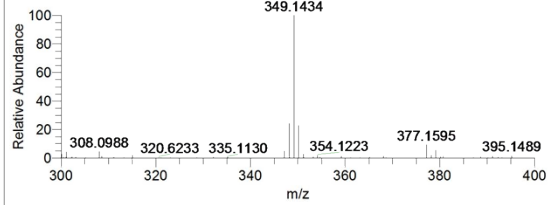

BM60-2 #2401-2461 RT: 17.24-17.58 AV: 61 NL: 1.74E6  
F: FTMS + c ESI Full ms [100.00-900.00]

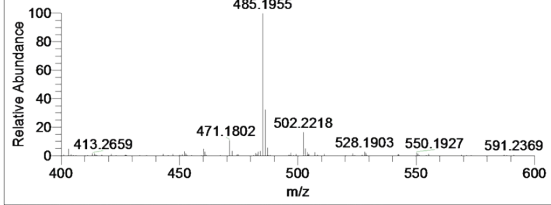

BM60-2 #2502-2540 RT: 17.84-18.11 AV: 39 NL: 1.57E6  
F: FTMS + c ESI Full ms [100.00-900.00]

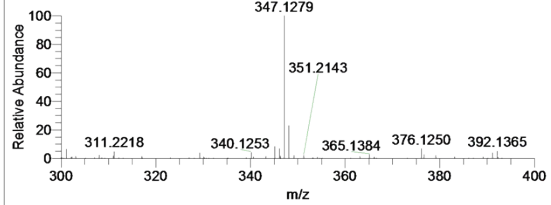

BM60-2 #2556-2599 RT: 18.23-18.54 AV: 44 NL: 1.33E7  
F: FTMS + c ESI Full ms [100.00-900.00]

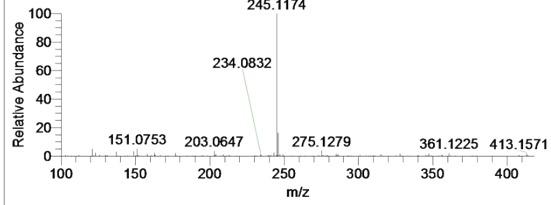

Supplement: c6ra17059e1.pdf [file c6ra17059e1.pdf]
